# Supplementary material for: Towards technomimetic spoked wheels: dynamic hexakis-heteroleptic coordination at a hexakis-terpyridine scaffold
Source: Royal Society of Chemistry journal article supplement (doi:10.1039/b718185j), 2008-01-01

*Electronic Supplementary Information (ESI).....*

## **Towards technomimetic spoked wheels: Dynamic hexakis-heteroleptic coordination at a hexakis-terpyridine scaffold**

*Michael Schmittel\* and Prasenjit Mal*

*Center of Micro and Nanochemistry and Engineering, Organische Chemie I, Universität  
Siegen, Adolf-Reichwein Str. 2, D-57068 Siegen, Germany*

*E-mail: [schmittel@chemie.uni-siegen.de](mailto:schmittel@chemie.uni-siegen.de)*

*Fax: (+49) 271-740-3270*

**Chart S1.** Ligands used for the present study.

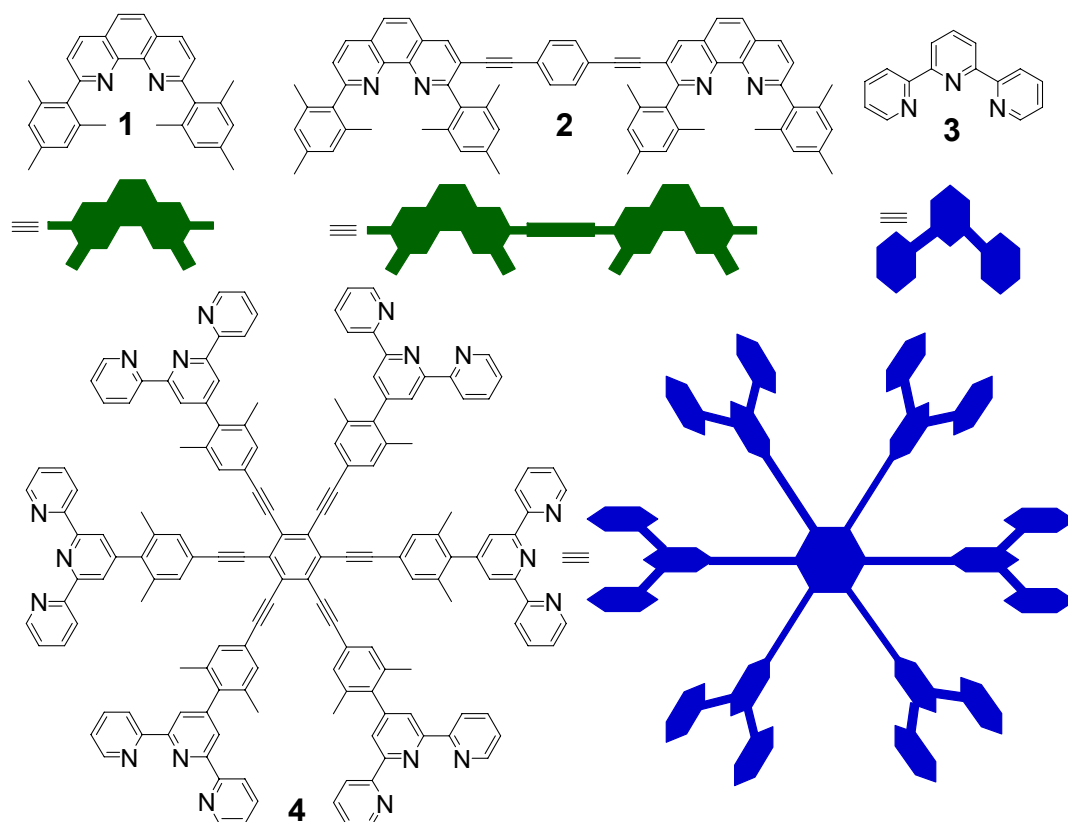

### Experimental:

**General.**  $^1\text{H}$  NMR and  $^{13}\text{C}$  NMR spectra were measured on Bruker AC 200 (200 MHz) or Avance 400 (400 MHz) machines. NMR analysis was conducted at room temperature mainly in deuterated dichloromethane unless specified otherwise.  $[\text{Cu}(\text{MeCN})_4]\text{PF}_6$  was prepared according to the known procedure.<sup>1</sup> Positive ESI-MS spectra were recorded on a LCQ Deca Thermo Quest instrument, scanning the  $m/z$  range 200-4000. Typically, each time 25 scans were accumulated for one spectrum. The samples were introduced in the ES source at a flow rate of 10 mL/min. Typical ESI-MS conditions used in this study: the sheath gas flow rate, spray voltage, capillary voltage and tube lense offset were set at 50 (arb), 5 (kV), 200 °C, 41 (V) and 5 (V) respectively, in order to avoid fragmentation. Assignment of ions was further confirmed by comparison of their isotopic pattern with the calculated ones and also by collisional fragmentations. UV/Vis spectra (for the complexes) were recorded on a Tidas II spectrophotometer using dichloromethane as the solvent. Molecular modelling was done with the MM +force field as implemented in Hyperchem 6.02. Hyperchem<sup>®</sup> 6.02 Release for Windows by Hypercube, Inc. 2000. MM + force field.

(1) Kubas, G. J. *Inorg. Synth.* **1979**, *19*, 90–92.

**Synthesis.** Chart S1 depicts phenanthrolines **1,2** and terpyridines **3,4** used as building blocks for the present study. Terpyridine **3** was purchased and used as received. Synthesis of compounds **1<sup>2</sup>** and **2<sup>3</sup>** was achieved along established protocols elaborated in our group. In Scheme S1, the synthesis of **4** (hexakis[4'-(4-ethynyl-2,6-dimethylphenyl)-2,2':6',2''-terpyridyl]benzene), is described. The first step involved the synthesis of hexakis(trimethylsilylethynyl)benzene (**5**)<sup>4</sup> via a Sonogashira-Negishi coupling.<sup>5</sup> Deprotection of **5** using K<sub>2</sub>CO<sub>3</sub> in methanol led to hexakis(ethynyl)benzene (**6**).<sup>6</sup> Since **6** was found to be very unstable, it was not purified for the ensuing step. The final step employed a Sonogashira coupling reaction between **6** and **7**<sup>7</sup> in presence of Pd(0) and CuI as catalyst. For this step exclusion of oxygen was crucial, because traces thereof in the reaction mixture led to a notorious and inseparable mixture of products.

**Scheme S1.** Synthesis of hexakis[4'-(4-ethynyl-2,6-dimethylphenyl)-2,2':6',2''-terpyridyl]benzene (**4**).

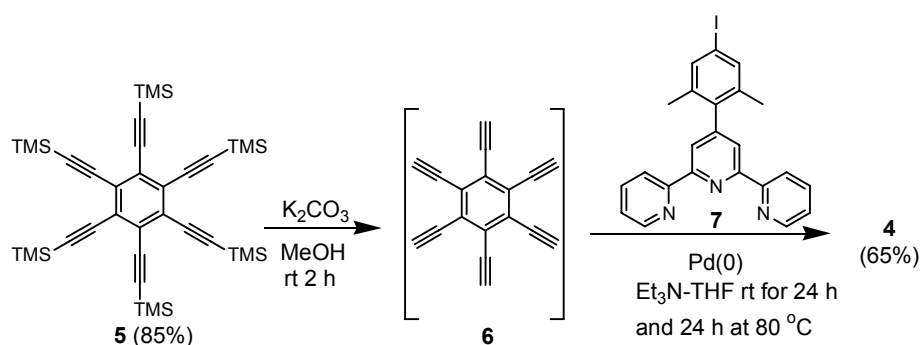

**Procedure for the synthesis hexakis[4'-(4-ethynyl-2,6-dimethylphenyl)-2,2':6',2''-terpyridyl]benzene (**4**):** To a degassed solution of hexakis(trimethylsilylethynyl)benzene (**5**) (118 mg, 0.180 mmol) in THF (10 mL) and methanol (10 mL) was added K<sub>2</sub>CO<sub>3</sub> (248.0 mg, 1.79 mmol) and water (0.1 mL). The resulting mixture was stirred at room temperature for 2 h. After addition of water (30 mL) the mixture was extracted with diethyl ether, washed with water, and dried over Na<sub>2</sub>SO<sub>4</sub>. After removal of the solvents, dry THF (10 mL) and toluene (10 mL) were added immediately to the white solid **6** while purging thoroughly with argon. To the solution was added triethylamine (8.0 mL), 4'-(4-iodo-2,6-dimethylphenyl)-2,2':6',2''-terpyridine (**7**) (583 mg, 1.26 mmol) and CuI (12.0 mg, 63.0 μmol). Finally, after an addition

(2) Kalsani, V.; Ammon, H.; Jäckel, F.; Rabe, J. P.; Schmittl, M. *Chem. Eur. J.* **2004**, *10*, 5481–5492.

(3) (a) Schmittl, M.; Michel, C.; Wiegrefe, A.; Kalsani, V. *Synthesis* **2001**, 1561–1567.

(4) Sonoda, M.; Inaba, A.; Itahashi, K.; Tobe, Y. *Org. Lett.* **2001**, *03*, 2419–2421.

(5) Sonoda, M.; Inaba, A.; Itahashi, K.; Tobe, Y. *Org. Lett.* **2001**, *03*, 2419–2421.

(6) Bunz, U. H. F.; Rubin, Y.; Tobe, Y. *Chem. Soc. Rev.*, **1999**, *28*, 107–119.

(7) Schmittl, M.; Kalsani, V.; Mal, P.; Bats, J. W. *Inorg. Chem.* **2006**, *45*, 6370–6377.

of Pd(PPh<sub>3</sub>)<sub>4</sub> (124.0 mg, 0.107 mmol) to the degassed mixture, the mixture was stirred at room temperature for 24 h and at 80 °C for additional 24 h under argon atmosphere. The reaction mixture was diluted with dichloromethane, washed successively with 2N KOH and brine, dried over Na<sub>2</sub>SO<sub>4</sub>, and concentrated. The crude mixture was purified by column chromatography on neutral alumina with CH<sub>2</sub>Cl<sub>2</sub>, ethyl acetate and triethylamine (90:9:1) to afford **4** (262 mg, 65%) as brownish powder.

**Hexakis(trimethylsilylethynyl)benzene (5)**: Yield 85%; mp 224.7 °C (from DSC analysis) (lit<sup>8</sup> > 300 °C); <sup>1</sup>H NMR ([D]Chloroform, 25 °C, 400 MHz): δ = 0.28 ppm (s, 54H); <sup>13</sup>C NMR ([D]Chloroform, 25 °C, 100 MHz): δ = 127.9, 105.2, 101.0, 0.01 ppm.

**Hexaethynylbenzene (6)**: Yield (quantitative); <sup>1</sup>H NMR ([D<sub>6</sub>]Dimethylsulfoxide, 25 °C, 400 MHz): δ = 4.96 ppm (s, 6H); <sup>13</sup>C NMR ([D<sub>6</sub>]Dimethylsulfoxide, 25 °C, 400 MHz): δ = 127.7, 91.6, 79.3 ppm.

**Hexakis[3,5-dimethyl-1,4-(2,2':6',2''-terpyridine-4'-yl)phenylethynyl]benzene (4)**: Mp > 300 °C; <sup>1</sup>H NMR ([D<sub>2</sub>]Dichloromethane, 25 °C, 400 MHz): δ = 8.67 (d, *J* = 8.0 Hz, 12H), 8.60-8.57 (m, 12H), 8.35 (s, 12H), 7.86 (dt, *J* = 8.0, 2.0 Hz, 12H), 7.64 (s, 12H), 7.29 (ddd, *J* = 8.0, 5.0, 1.0 Hz, 12H), 2.16 ppm (s, 36H); <sup>13</sup>C NMR ([D<sub>2</sub>]Dichloromethane, 25 °C, 100 MHz): δ = 156.4, 156.2, 150.9, 149.5, 141.4, 137.1, 136.4, 131.3, 127.9, 124.2, 122.6, 121.7, 121.3, 100.3, 87.6, 21.0 ppm; IR (KBr): ν = 3051, 2955, 2920, 2360, 2201, 1605, 1584, 1565, 1467, 1442, 1389, 1262, 1119 cm<sup>-1</sup>; ESI-MS: *m/z* (%): 2236.5 (23) [M]<sup>+</sup>: (calcd for [C<sub>156</sub>H<sub>109</sub>N<sub>18</sub>] [M+H]<sup>+</sup>: 2234.9); 1118.9 (81) [M+2H]<sup>2+</sup> (calcd for [C<sub>156</sub>H<sub>110</sub>N<sub>18</sub>]<sup>2+</sup>: 1118.0); 746.9 (100) [M+3H]<sup>3+</sup> (calcd for [C<sub>156</sub>H<sub>111</sub>N<sub>18</sub>]<sup>3+</sup>: 745.6); elemental analysis calcd (%) for C<sub>156</sub>H<sub>108</sub>N<sub>18</sub>·2CH<sub>2</sub>Cl<sub>2</sub>: C 78.92, H 4.69, N 10.49; found: C 79.17, H 4.88, N 10.08.

(8) (a) Neenan, T. X.; Whitesides, G. M. *J. Org. Chem.* **1988**, *53*, 2489–2496; (b) Diercks, R.; Armstrong, J. C.; Boese, R.; Vollhardt, K. P. *C. Angew. Chem. Int. Ed. Engl.* **1986**, *25*, 268–269.

**Scheme S2.** Cartoon representations for the construction of the Assemblies.

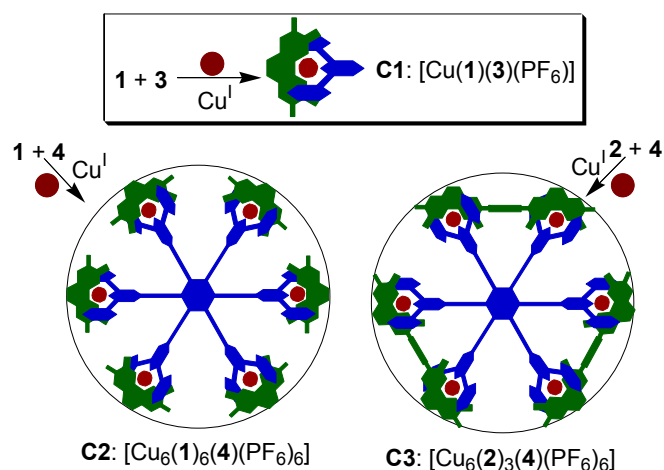

**General procedure for the formation of the assemblies:** The supramolecular assemblies were prepared by mixing stoichiometric amounts of phenanthrolines and terpyridines with [Cu(MeCN)<sub>4</sub>]PF<sub>6</sub> in dichloromethane. The mixing sequence was as followed: first phenanthroline and Cu<sup>I</sup> were added and dissolved in dichloromethane, then to the clear solution the corresponding amount of terpyridine was added. The resulting dark red solution was analyzed without any purification by ESI-MS, <sup>1</sup>H NMR, <sup>13</sup>C NMR, IR and elemental analysis.

**C1 [Cu(1)(3)]<sup>+</sup>:** > 300 °C; <sup>1</sup>H NMR ([D<sub>2</sub>]Dichloromethane, 25 °C, 400 MHz): δ = 8.60 (d, *J* = 8.0 Hz, 2H, phenanthroline), 8.17 (s, 2H; phenanthroline), 8.03 (t, *J* = 8.0 Hz, 1H; terpyridine), 7.93 (d, *J* = 8.0 Hz, 2H; terpyridine), 7.76 (d, *J* = 8.0 Hz, 2H; phenanthroline), 7.73 (d, *J* = 8.0 Hz, 2H; terpyridine), 7.59 (d, *J* = 4.0 Hz, 2H; terpyridine), 7.49 (t, *J* = 8.0 Hz, 2H; terpyridine), 7.06-7.02 (m, 2H; terpyridine), 6.30 (s, 2H; (phenanthroline) mesityl H), 1.97 (s, 6H; (phenanthroline) mesityl *p*-CH<sub>3</sub>), 1.58 ppm (s, 12H; (phenanthroline) mesityl *o*-CH<sub>3</sub>); <sup>13</sup>C NMR ([D<sub>2</sub>]Dichloromethane, 25 °C, 100 MHz): δ = 159.2, 153.2, 152.9, 148.1, 144.3, 138.1, 137.8, 137.2, 136.5, 135.3, 128.1, 127.9, 127.0, 126.9, 124.7, 123.1, 121.8, 116.9 (aromatic), 20.9, 20.0 ((phenanthroline) mesityl CH<sub>3</sub>) ppm; IR (KBr): ν = 2915, 2857, 1610, 1583, 1480, 1446, 1377, 1298 cm<sup>-1</sup>; ESI-MS: *m/z* (%): 714.3 (100) [M]<sup>+</sup>: (calcd for [CuC<sub>45</sub>H<sub>39</sub>N<sub>5</sub>]<sup>+</sup>: 712.3); elemental analysis calcd (%) for CuC<sub>45</sub>H<sub>39</sub>N<sub>5</sub>·1/2CH<sub>2</sub>Cl<sub>2</sub>: C 60.57, H 4.48, N 7.77; found: C 60.77, H 4.38, N 7.53.

**C2 [Cu<sub>6</sub>(1)<sub>6</sub>(4)]<sup>6+</sup>:** > 300 °C; <sup>1</sup>H NMR ([D<sub>2</sub>]Dichloromethane, 25 °C, 400 MHz): δ = 8.61 (d, *J* = 8.0 Hz, 12 H; phenanthroline), 8.20 (s, 12H; phenanthroline), 7.91 (s, 12H; terpyridine),

7.78 (d,  $J = 8.0$  Hz, 12H; terpyridine), 7.77 (s, 12H; terpyridine), 7.72 (d,  $J = 8.0$  Hz, 12H; phenanthroline), 7.65 (d,  $J = 4.0$  Hz, 12H; terpyridine), 7.44 (td,  $J = 8.0, 1.0$  Hz, 12H; terpyridine), 7.06 (dd,  $J = 8.0, 4.0$  Hz, 12H; terpyridine), 6.23 (s, 24H; (phenanthroline) mesityl H), 2.28 (s, 36H; (terpyridine) CH<sub>3</sub>), 1.85 (s, 36H; (phenanthroline) mesityl *p*-CH<sub>3</sub>), 1.54 ppm (s, 72H; (phenanthroline) mesityl *o*-CH<sub>3</sub>); <sup>13</sup>C NMR ([D<sub>2</sub>]Dichloromethane, 25 °C, 100 MHz):  $\delta = 159.1, 153.7, 152.4, 150.7, 148.1, 144.2, 139.7, 138.0, 137.9, 137.4, 137.3, 136.7, 136.1, 135.2, 131.6, 128.2, 127.5, 127.0, 126.9, 125.1, 123.5, 123.5, 121.8$  (aromatic), 99.8, 87.9 (ethynyl), 21.0, 20.8, 19.9 (benzyl) ppm; IR (KBr):  $\nu = 2919, 2855, 2376, 2199, 1609, 1582, 1476, 1420$  cm<sup>-1</sup>; ESI-MS:  $m/z$  (%): 1849.5 (6) [M]<sup>3+</sup>: (calcd for [Cu<sub>6</sub>C<sub>336</sub>H<sub>276</sub>N<sub>30</sub>.3PF<sub>6</sub>]<sup>3+</sup>: 1850.1); 1350.9 (100) [M]<sup>4+</sup>: (calcd for [Cu<sub>6</sub>C<sub>336</sub>H<sub>276</sub>N<sub>30</sub>.2PF<sub>6</sub>]<sup>4+</sup>: 1351.4); 1052.0 (91) [M]<sup>5+</sup>: (calcd for [Cu<sub>6</sub>C<sub>336</sub>H<sub>276</sub>N<sub>30</sub>.PF<sub>6</sub>]<sup>5+</sup>: 1052.0); 852.7 (9) [M]<sup>6+</sup>: (calcd for [Cu<sub>6</sub>C<sub>336</sub>H<sub>276</sub>N<sub>30</sub>]<sup>6+</sup>: 852.5); elemental analysis calcd (%) for Cu<sub>6</sub>C<sub>336</sub>H<sub>276</sub>N<sub>30</sub>.6PF<sub>6</sub>.4CH<sub>2</sub>Cl<sub>2</sub>: C 64.57, H 4.53, N 6.64; found: C 64.28, H 4.41, N 6.36.

**C3** [Cu<sub>6</sub>(**2**)<sub>3</sub>(**4**)]<sup>6+</sup>: > 300 °C; <sup>1</sup>H NMR ([D<sub>2</sub>]Dichloromethane + [D<sub>3</sub>]Acetonitrile (4:1), 25 °C, 400 MHz):  $\delta = 8.65$  (d,  $J = 8.0$  Hz, 6H; phenanthroline), 8.63 (s, 6H; phenanthroline), 8.24 (d,  $J = 9.0$  Hz, 6H; phenanthroline), 8.17 (d,  $J = 8.0$  Hz, 6H; phenanthroline), 7.96 (s, 12H; terpyridine), 7.87 (d,  $J = 8.0$  Hz, 12H; terpyridine), 7.83 (s, 12H; terpyridine), 7.75 (d,  $J = 8.0$  Hz, 6H; phenanthroline), 7.61-7.52 (m, 24H; terpyridine), 7.08 (t,  $J = 4.0$  Hz, 12H; terpyridine), 6.50 (s, 12H; phenyl), 6.24 (s, 12H; phenanthroline), 6.15 (s, 12H; phenanthroline), 2.42 (s, 18H; terpyridine CH<sub>3</sub>), 2.22 (s, 18H; (terpyridine) CH<sub>3</sub>), 1.96 (s, 18H; (phenanthroline) mesityl *p*-CH<sub>3</sub>), 1.94 (s, 18H; (phenanthroline) mesityl *p*-CH<sub>3</sub>), 1.45 (s, 36H; (phenanthroline) mesityl *o*-CH<sub>3</sub>), 1.43 (s, 36H; (phenanthroline) mesityl *o*-CH<sub>3</sub>) ppm; <sup>13</sup>C NMR ([D<sub>2</sub>]Dichloromethane + [D<sub>3</sub>]Acetonitrile (4:1), 25 °C, 100 MHz):  $\delta = 161.0, 159.4, 153.1, 152.0, 150.3, 147.8, 143.9, 142.4, 139.9, 137.6, 137.5, 137.3, 137.2, 137.1, 136.7, 136.5, 136.3, 136.0, 135.3, 134.9, 131.4, 131.3, 131.1, 128.4, 127.8, 127.6, 127.6, 127.2, 127.0, 126.8, 126.4, 125.0, 123.1, 123.0, 122.5, 121.9, 121.8$  (aromatic), 99.6, 96.8, 88.8, 87.6 (ethynyl), 21.0, 20.7, 20.6, 20.4, 19.4, 19.1 (benzyl) ppm; IR (KBr):  $\nu = 2920, 2855, 2379, 2201, 1609, 1462, 1401$  cm<sup>-1</sup>; ESI-MS:  $m/z$  (%): 1972.2 (5) [M]<sup>3+</sup>: (calcd for [Cu<sub>6</sub>C<sub>366</sub>H<sub>282</sub>N<sub>30</sub>.3PF<sub>6</sub>]<sup>3+</sup>: 1972.2); 1442.9 (69) [M]<sup>4+</sup>: (calcd for [Cu<sub>6</sub>C<sub>366</sub>H<sub>282</sub>N<sub>30</sub>.2PF<sub>6</sub>]<sup>4+</sup>: 1442.9); 1125.2 (100) [M]<sup>5+</sup>: (calcd for [Cu<sub>6</sub>C<sub>366</sub>H<sub>282</sub>N<sub>30</sub>.PF<sub>6</sub>]<sup>5+</sup>: 1125.3); 913.5 (18) [M]<sup>6+</sup>: (calcd for [Cu<sub>6</sub>C<sub>366</sub>H<sub>282</sub>N<sub>30</sub>]<sup>6+</sup>: 913.5); elemental analysis calcd (%) for Cu<sub>6</sub>C<sub>366</sub>H<sub>282</sub>N<sub>30</sub>.6PF<sub>6</sub>.4CH<sub>2</sub>Cl<sub>2</sub>: C 66.42, H 4.37, N 6.28; found: C 66.62, H 4.36, N 6.12.

**Figure S1.**  $^1\text{H}$  NMR Spectrum of **5** ( $[\text{D}]\text{Chloroform}$ ,  $25\text{ }^\circ\text{C}$ ,  $400\text{ MHz}$ )

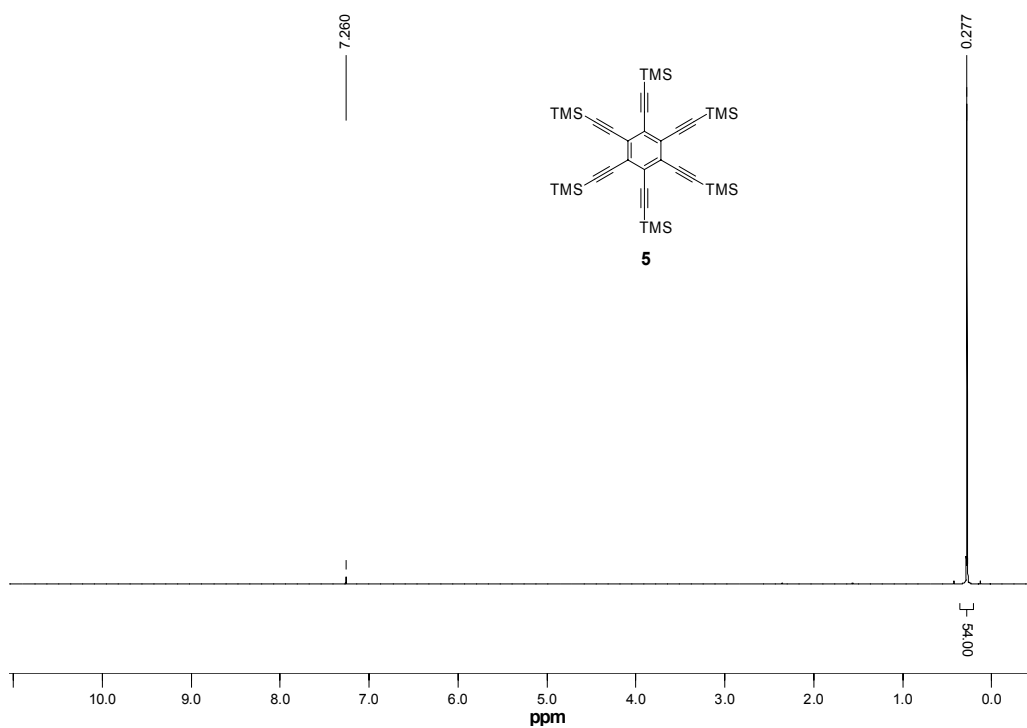

**Figure S2.**  $^{13}\text{C}$  NMR Spectrum of **5** ( $[\text{D}]\text{Chloroform}$ ,  $25\text{ }^\circ\text{C}$ ,  $100\text{ MHz}$ )

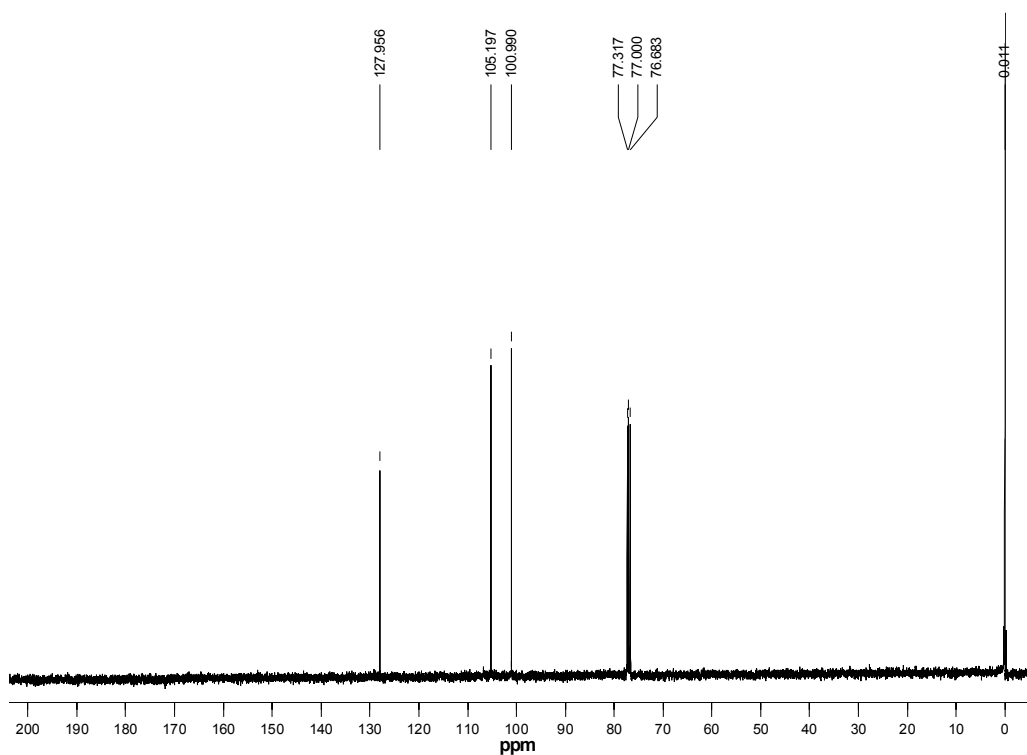

**Figure S3.**  $^1\text{H}$  NMR Spectrum of **6** ( $[\text{D}_6]$ Dimethylsulfoxide, 25 °C, 400 MHz).

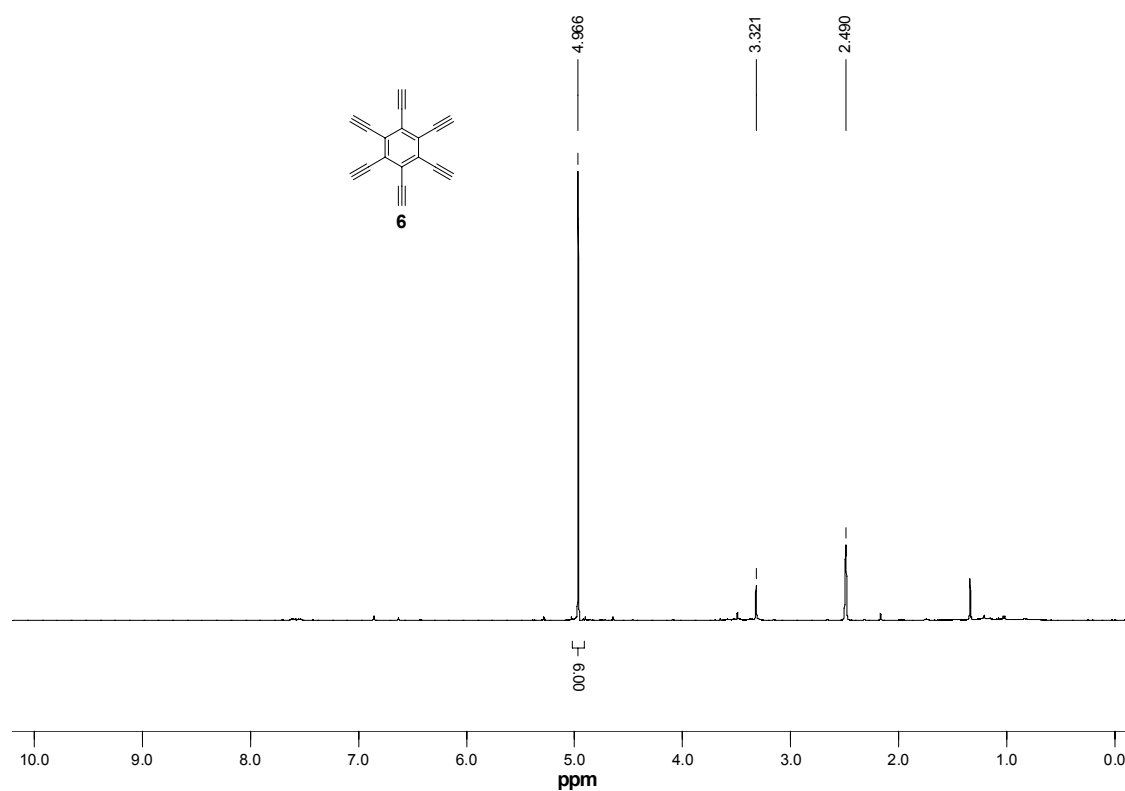

**Figure S4.**  $^{13}\text{C}$  NMR Spectrum of **6** ( $[\text{D}_6]$ Dimethylsulfoxide, 25 °C, 100 MHz).

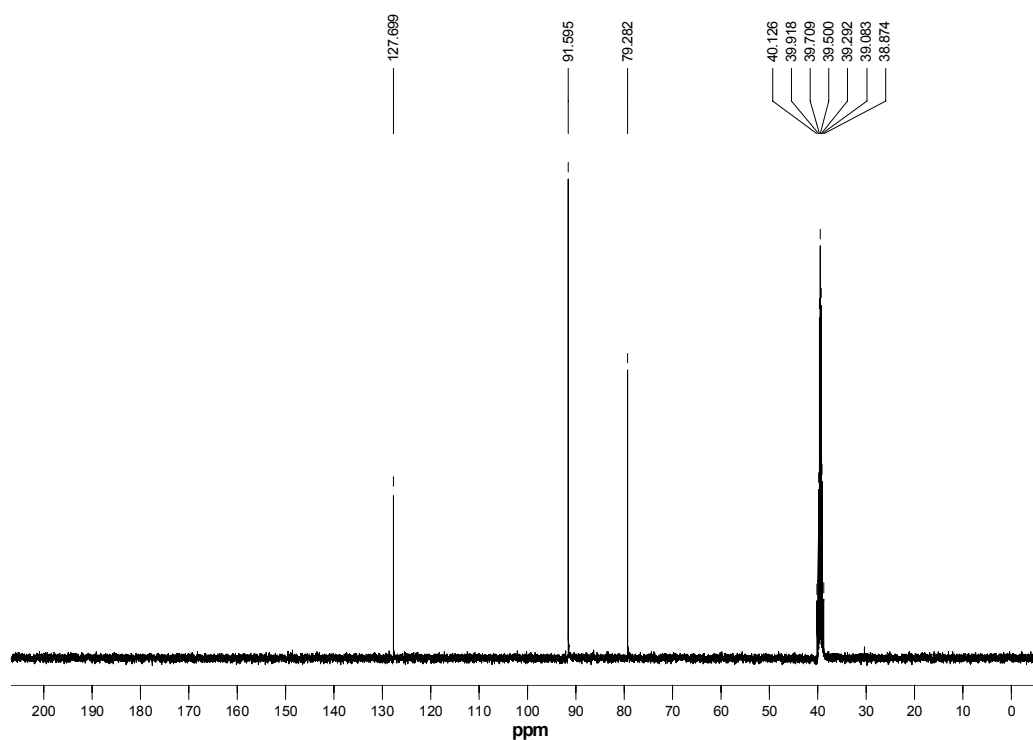



Figure S5.  $^1\text{H}$  NMR Spectrum of **4** ( $[\text{D}_2]$ Dichloromethane, 25 °C, 400 MHz).

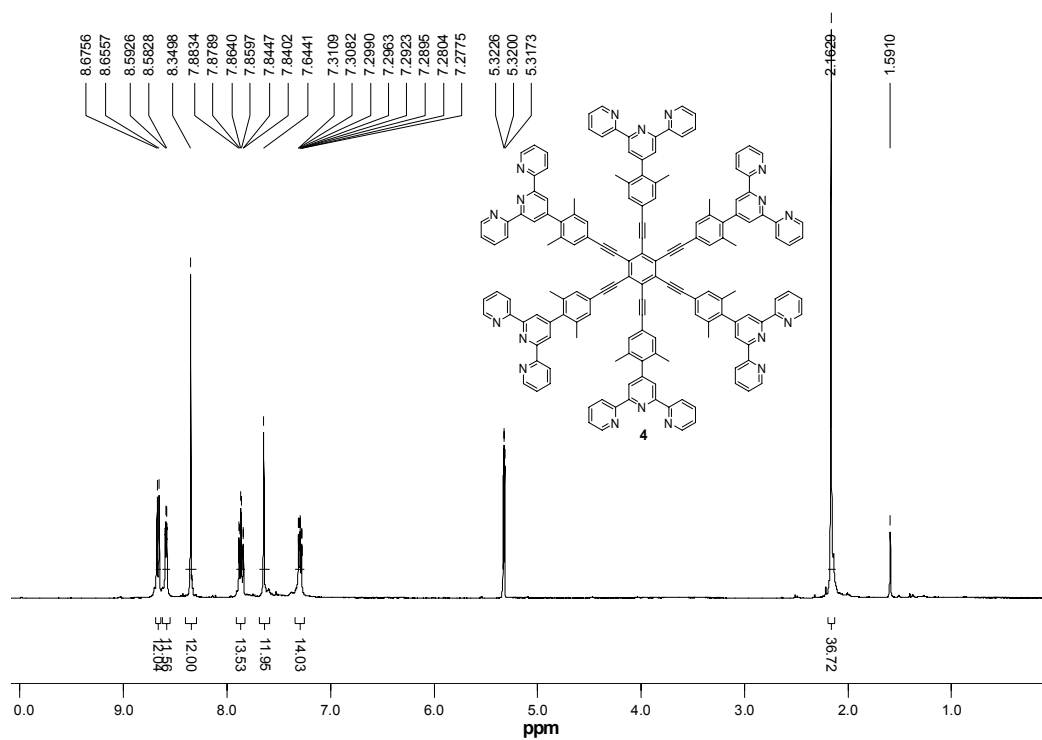

Figure S6.  $^{13}\text{C}$  NMR Spectrum of **4** ( $[\text{D}_2]$ Dichloromethane, 25 °C, 100 MHz).

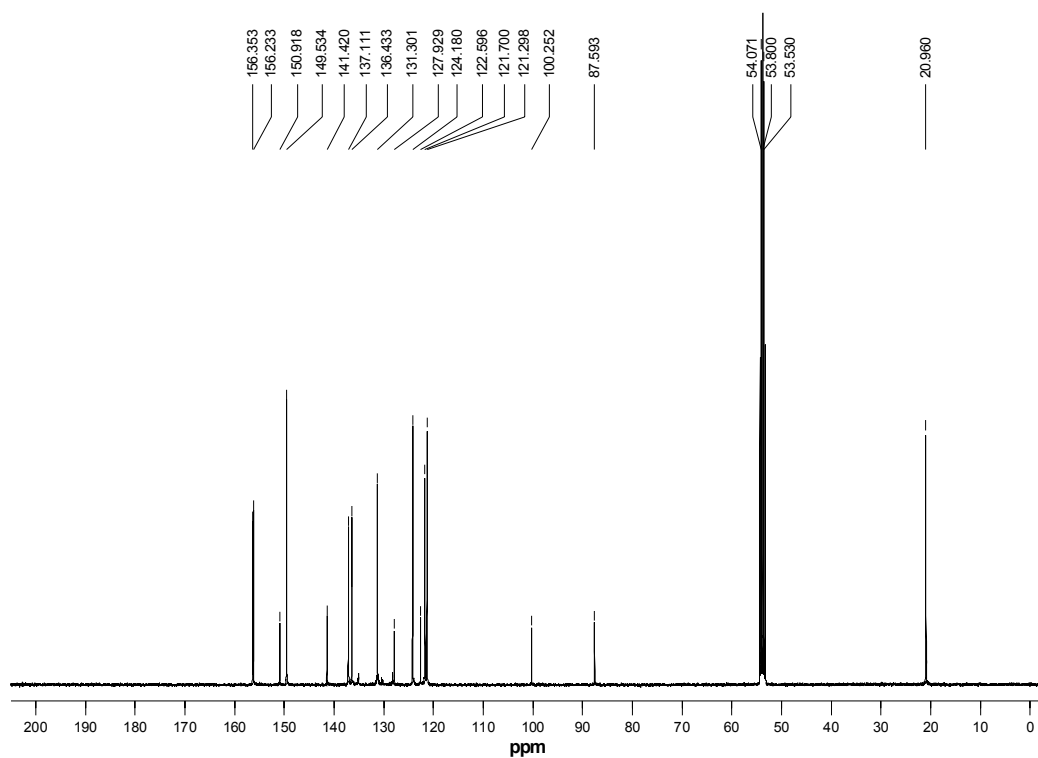

**Figure S7.**  $^1\text{H}$  NMR Spectrum of **C1** [ $\text{Cu}_6(\mathbf{1})(\mathbf{3})(\text{PF}_6)$ ] ( $[\text{D}_2]$ Dichloromethane, 25 °C, 400 MHz).

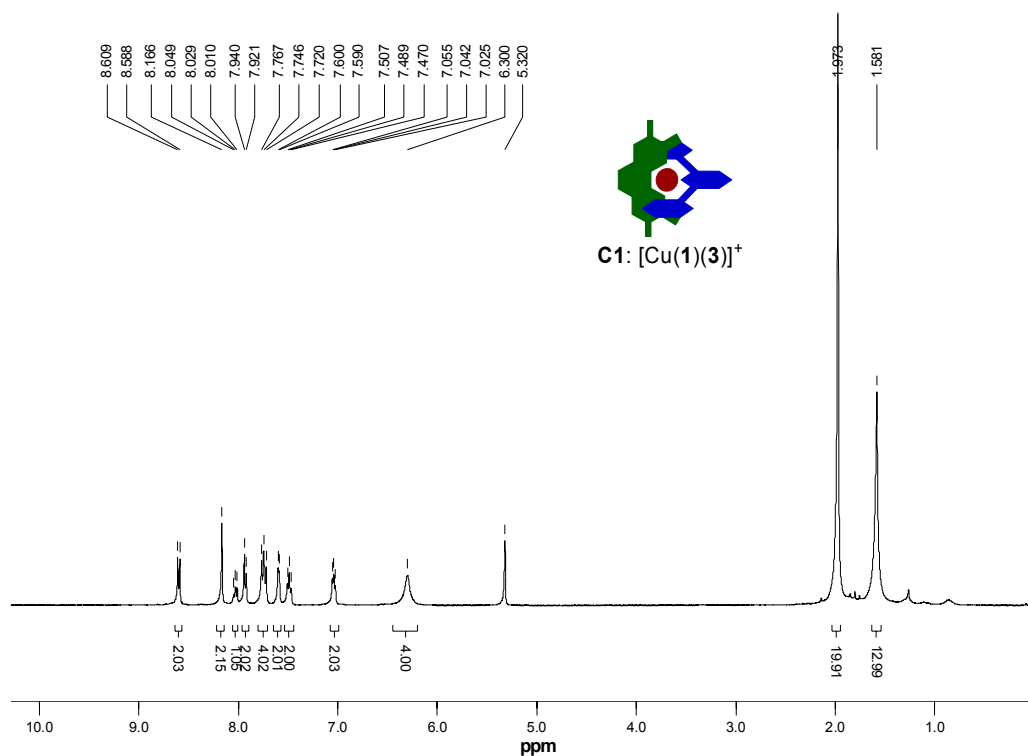

**Figure S8.**  $^{13}\text{C}$  NMR Spectrum of **C1** [ $\text{Cu}_6(\mathbf{1})(\mathbf{3})(\text{PF}_6)$ ] ( $[\text{D}_2]$ Dichloromethane, 25 °C, 100 MHz, (\*) acetone impurity).

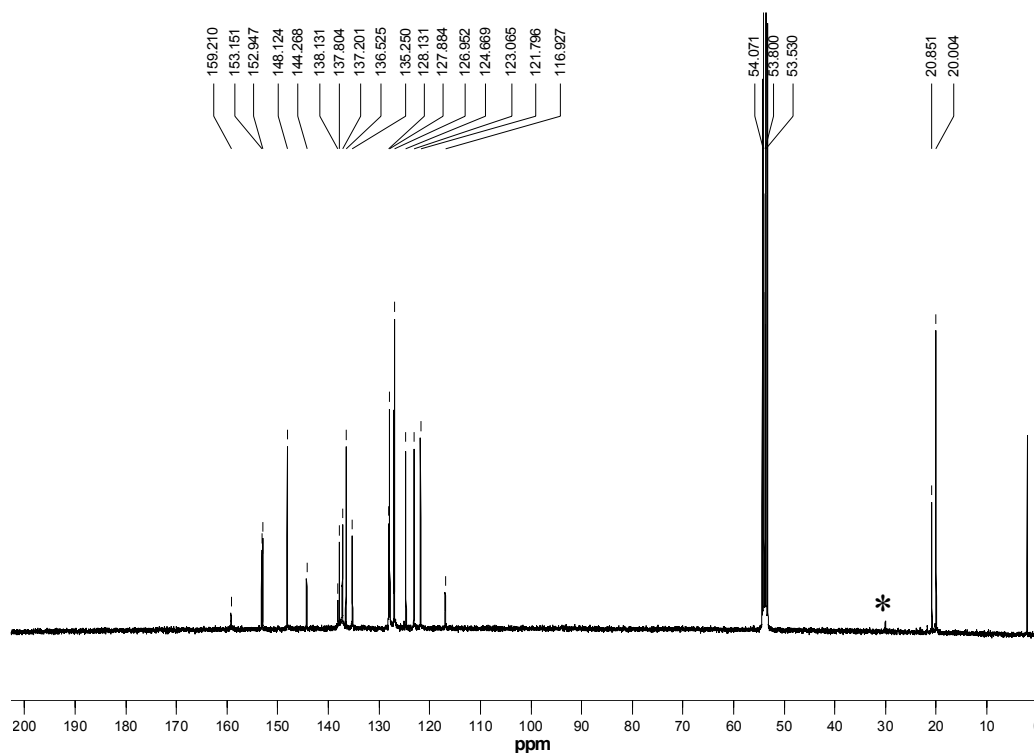

**Figure S9.**  $^1\text{H}$  NMR Spectrum of **C2**  $[\text{Cu}_6(\mathbf{1})_6(\mathbf{4})(\text{PF}_6)_6]$  ( $[\text{D}_2]$ Dichloromethane, 25 °C, 400 MHz).

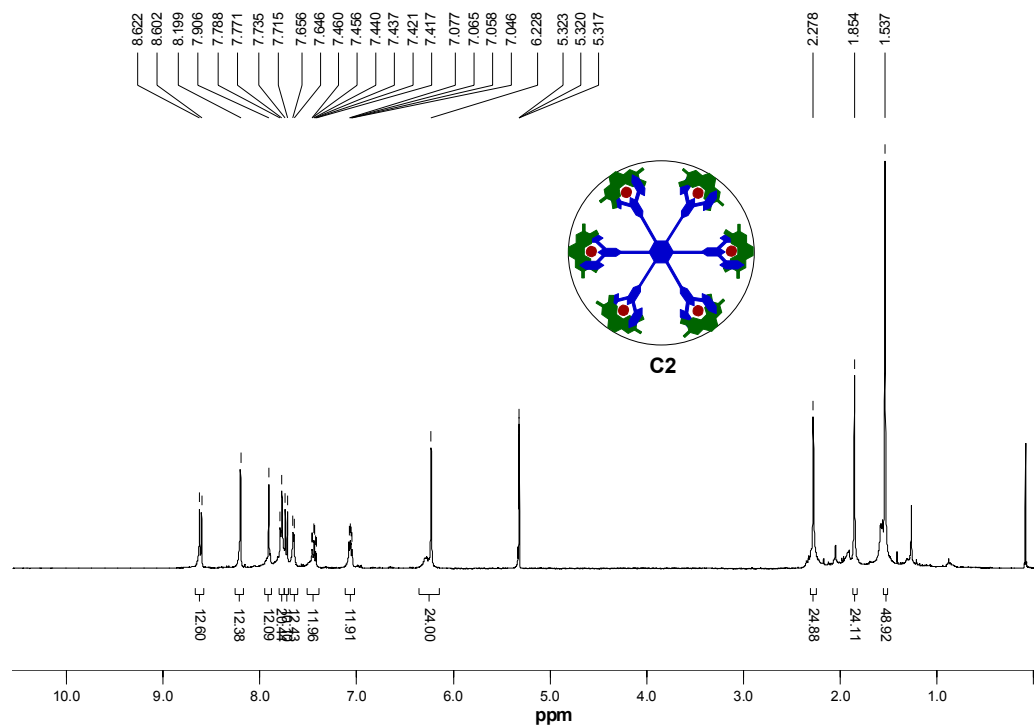

**Figure S10.**  $^{13}\text{C}$  NMR Spectrum of **C2**  $[\text{Cu}_6(\mathbf{1})_6(\mathbf{4})(\text{PF}_6)_6]$  ( $[\text{D}_2]$ Dichloromethane, 25 °C, 100 MHz, (\*) acetone impurity).

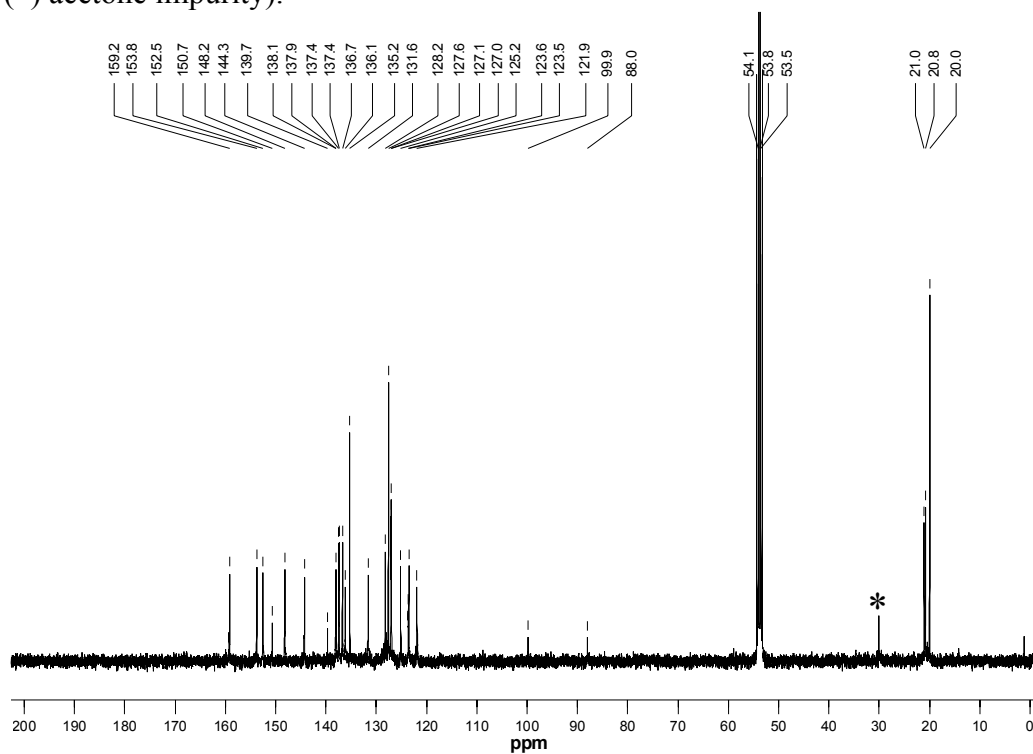

**Figure S11.**  $^1\text{H}$  NMR Spectrum of **C3**  $[\text{Cu}_6(\mathbf{2})_3(\mathbf{4})(\text{PF}_6)_6]$  ( $[\text{D}_2]$ Dichloromethane +  $[\text{D}_3]$ Acetonitrile (4:1) 25 °C, 400 MHz).

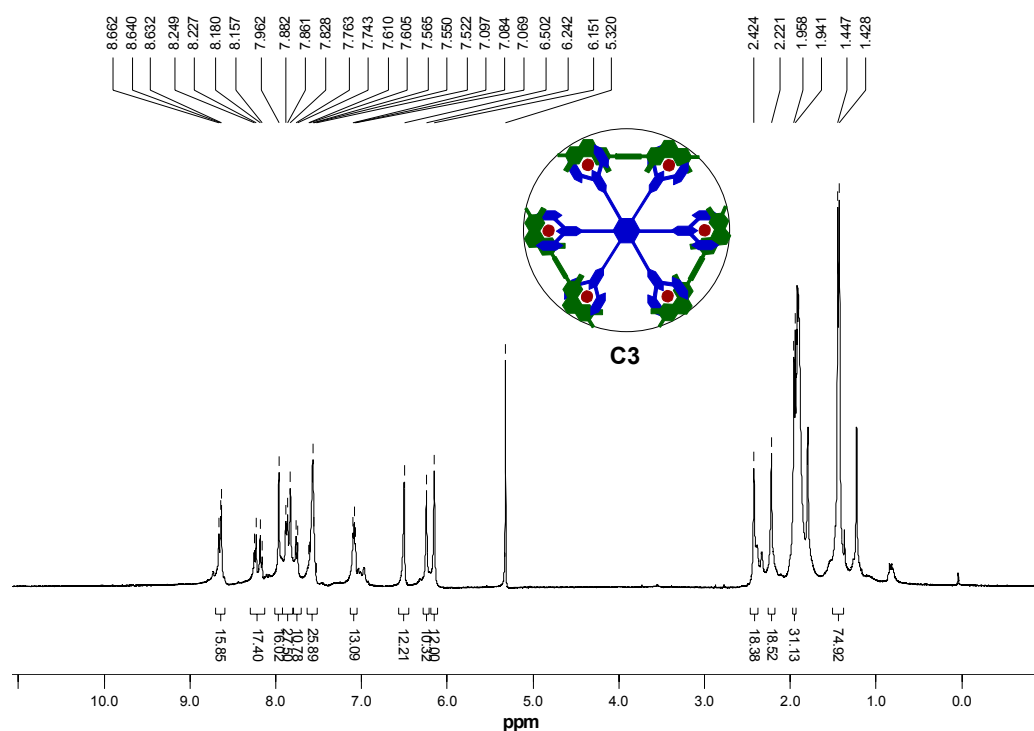

**Figure S12.**  $^{13}\text{C}$  NMR Spectrum of **C3**  $[\text{Cu}_6(\mathbf{2})_3(\mathbf{4})(\text{PF}_6)_6]$  ( $[\text{D}_2]$ Dichloromethane +  $[\text{D}_3]$ Acetonitrile (4:1) 25 °C, 100 MHz, (\*) acetone impurity).

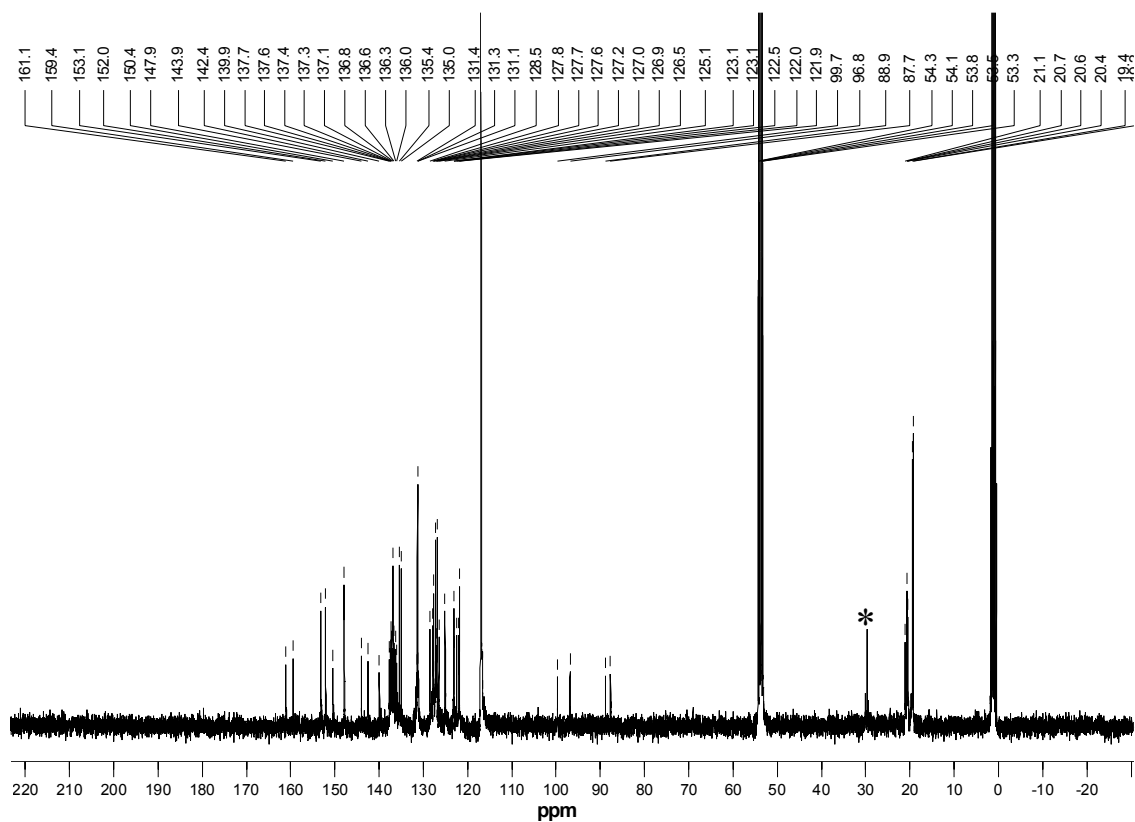

**Figure S13.** ESI-MS spectrum of **4** and the experimental isotopic distribution (black lines) for the 3+ (746.4) and 2+ (1119.1) charged species along with its calculated one (red lines). Inset shows the spectrum at high capillary voltage and low tube lense offset.

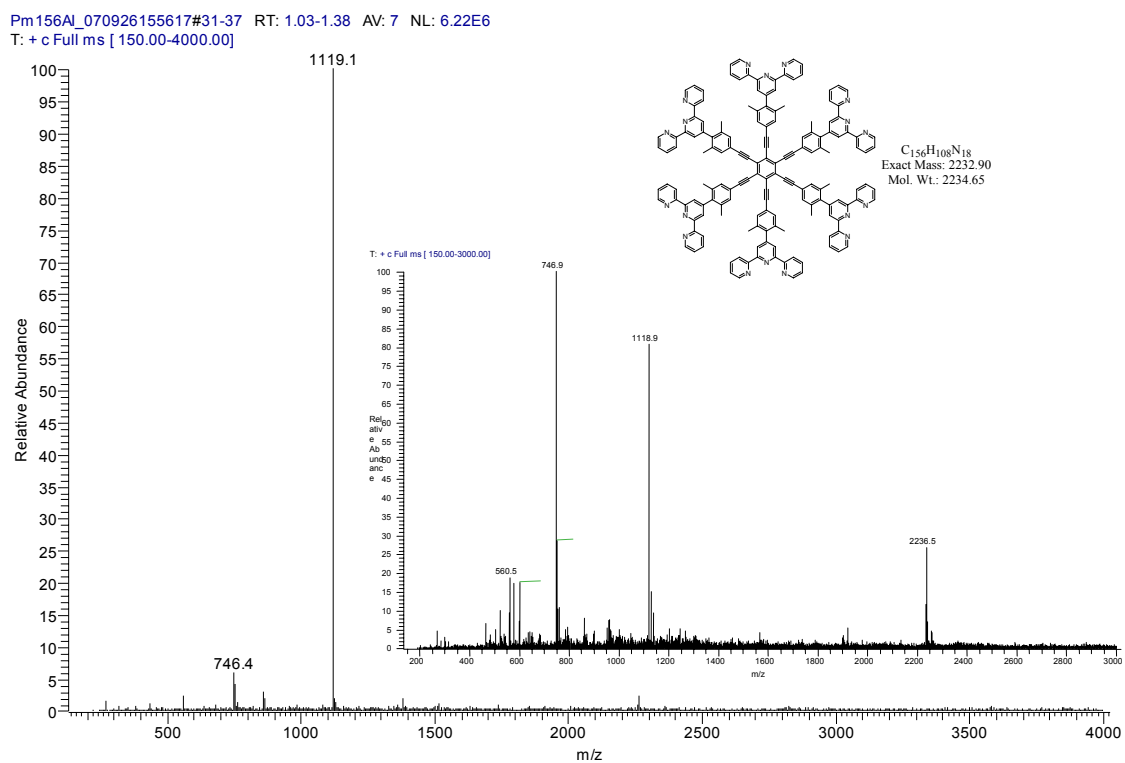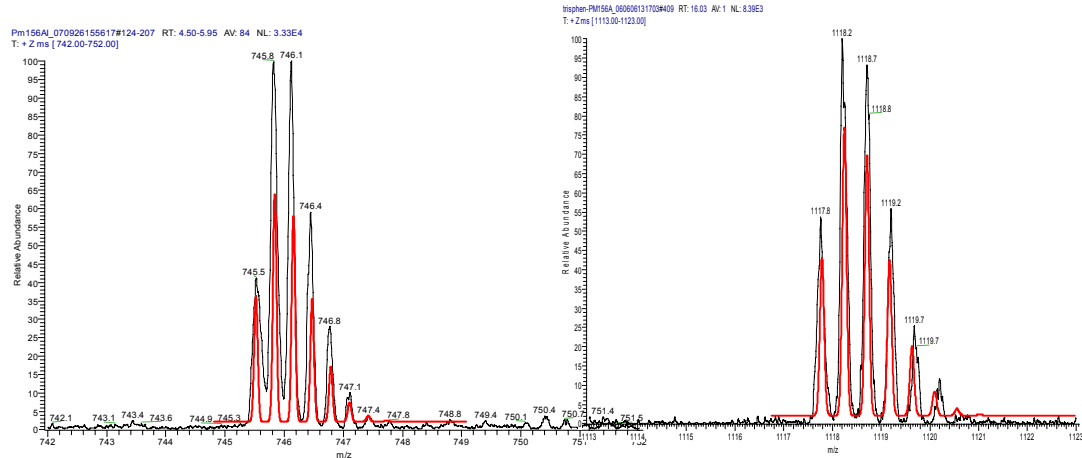

**Figure S14.** ESI-MS spectra of **C1** and the experimental isotopic distribution (black lines) for the 1+ charged species along with its calculated one (red lines).

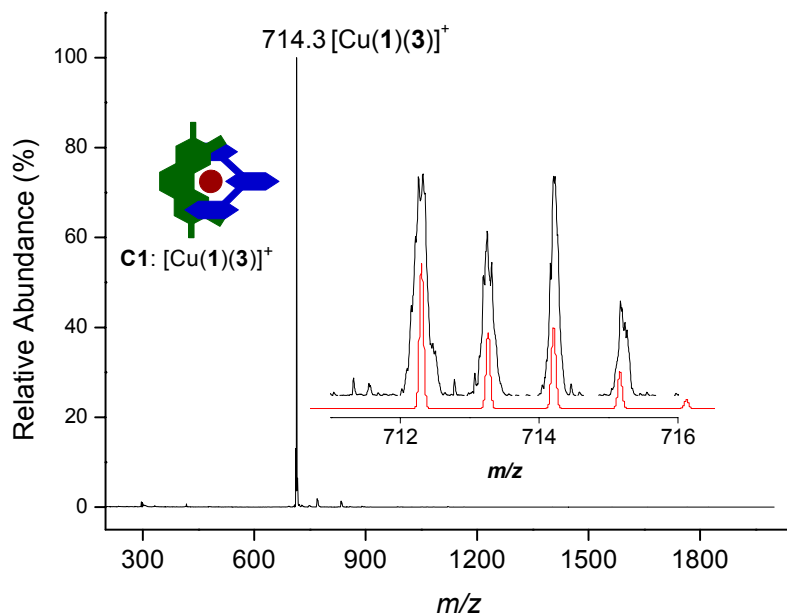

**Figure S15.** ESI-MS spectra of **C2** and the experimental isotopic distribution (black lines) for the 5+, 4+ and 3+ charged species along with its calculated one (red lines).

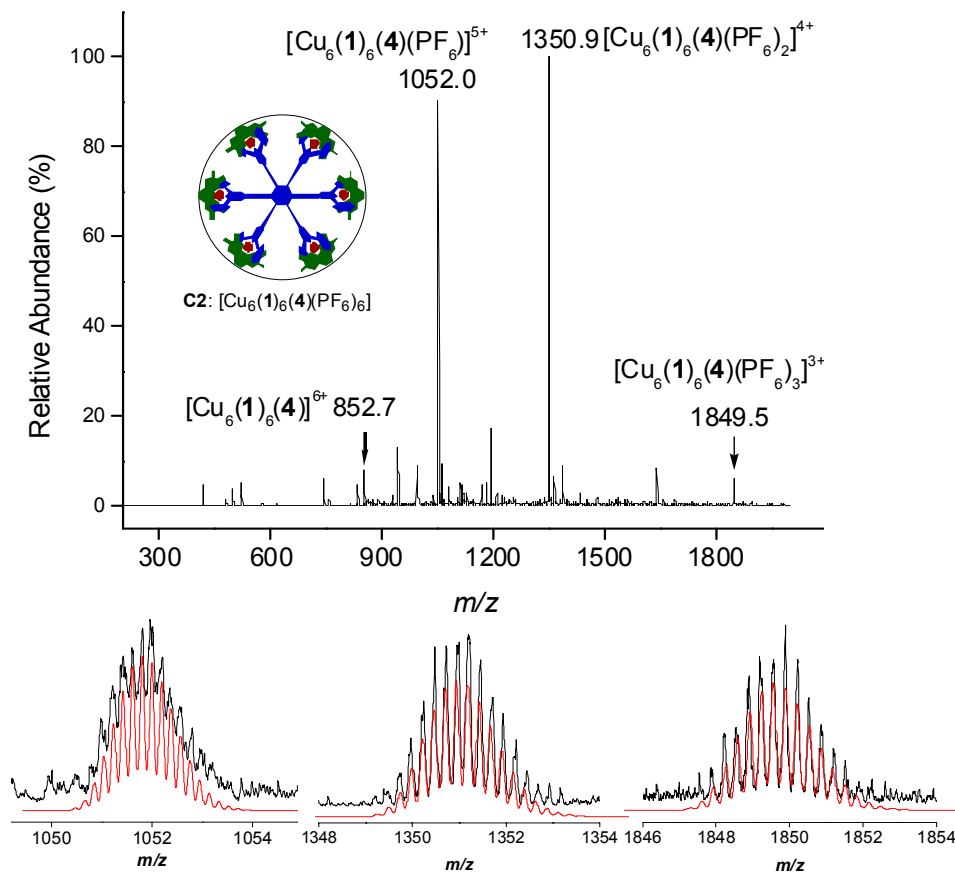

**Figure S16.** ESI-MS spectra of **C3** and the experimental isotopic distribution (black lines) for the 5+, 4+ and 3+ charged species along with its calculated one (red lines).

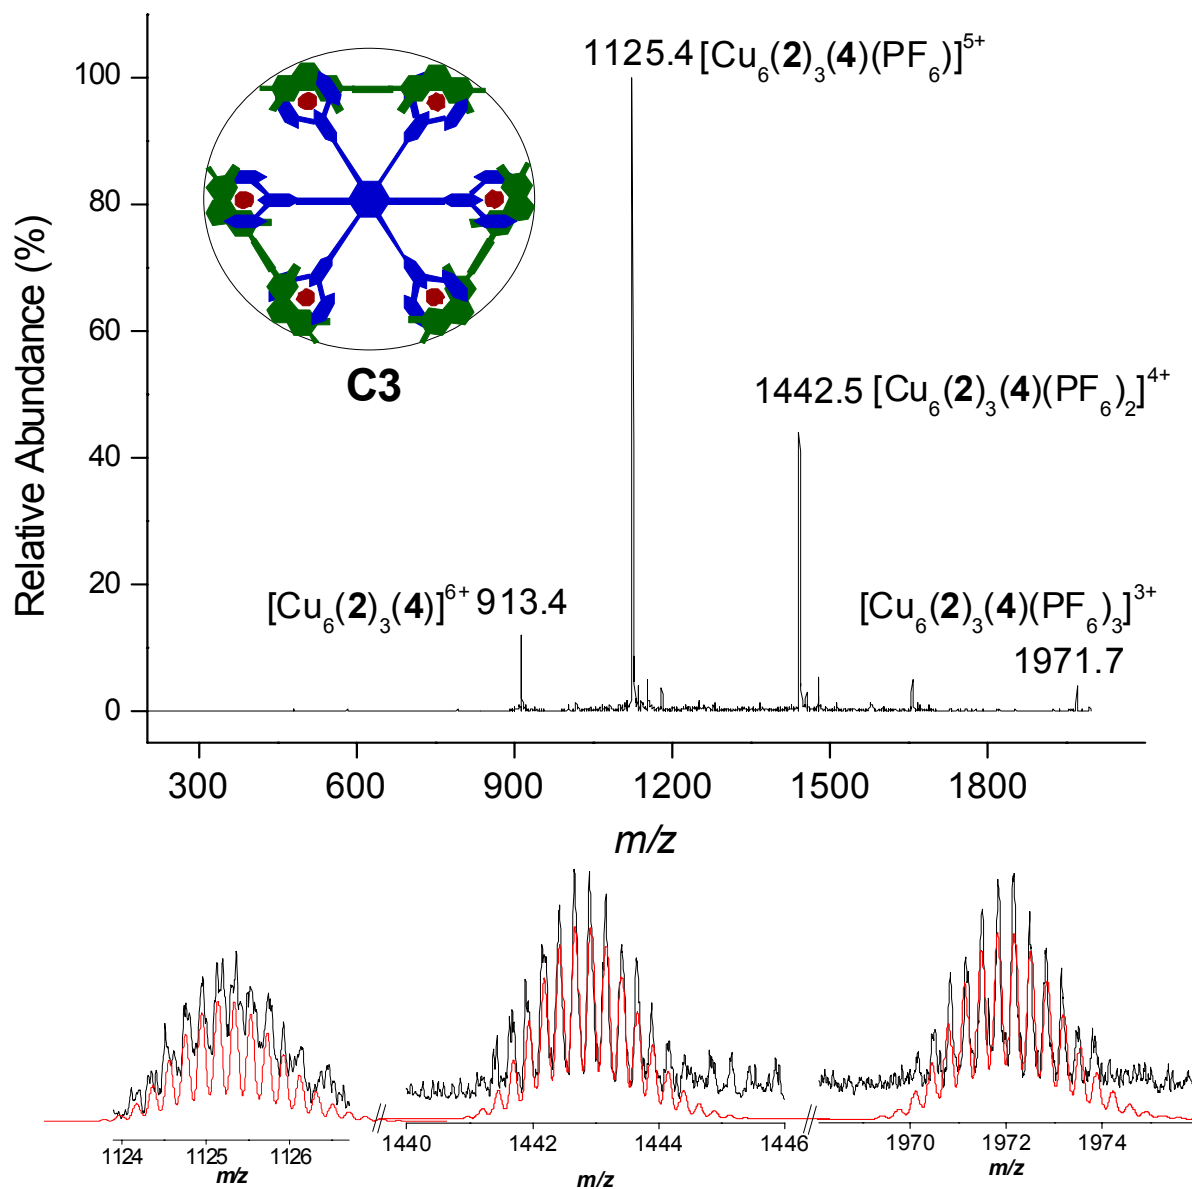

Supplement: b718185j.pdf [file b718185j.pdf]
